# Supplementary material for: Band alignment and enhancement of the interface properties for heterojunction solar cells by employing amorphous–nanocrystalline hierarchical emitter layers
Source: Royal Society of Chemistry journal article supplement (doi:10.1039/c6tc04930c), 2017-01-01
Supplement: c6tc04930c1.pdf [file c6tc04930c1.pdf]

Supplementary information for:

**Band Alignment and Interface Properties Enhancement for  
Heterojunction Solar Cell by Employing Amorphous-  
Nanocrystalline Hierarchical Emitter Layer**

Fengyou Wang<sup>a, b, c</sup>, Rongchi Du<sup>b</sup>, Qianshang Ren<sup>b</sup>, Changchun Wei<sup>b, c</sup>, Ying Zhao<sup>b, c</sup>,  
Xiaodan Zhang<sup>\* b, c</sup>

<sup>a</sup> Key Laboratory of Functional Materials Physics and Chemistry of the Ministry of Education,  
Jilin Normal University, Siping 136000, China.

<sup>b</sup> Institute of Photo Electronics thin Film Devices and Technology of Nankai University, Key  
Laboratory of Photoelectronic Thin Film Devices and Technology, Tianjin 300071, P. R. China

<sup>c</sup> Collaborative Innovation Center of Chemical Science and Engineering (Tianjin), Tianjin  
300072, P. R. China

**\*Corresponding Author**

Xiaodan Zhang, Email address: [xdzhang@nankai.edu.cn](mailto:xdzhang@nankai.edu.cn)

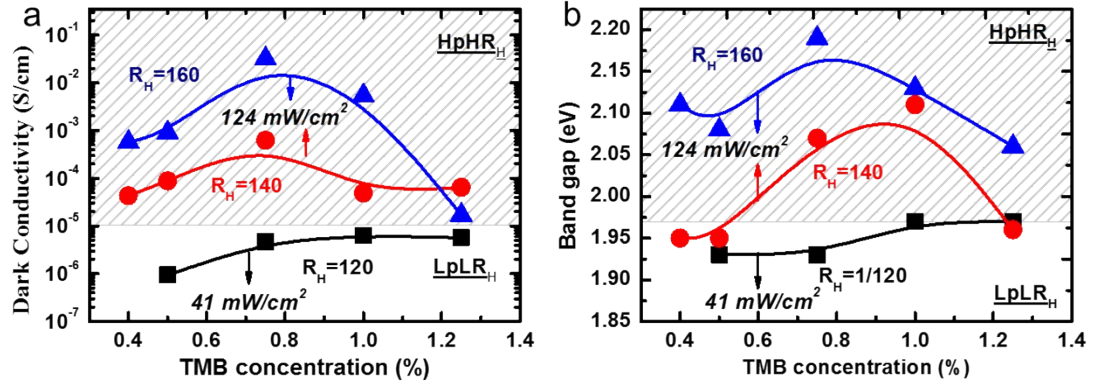

Fig. S1. (a) Dark conductivity and (b) band gap of p-type Si films deposited with various TMB concentrations.

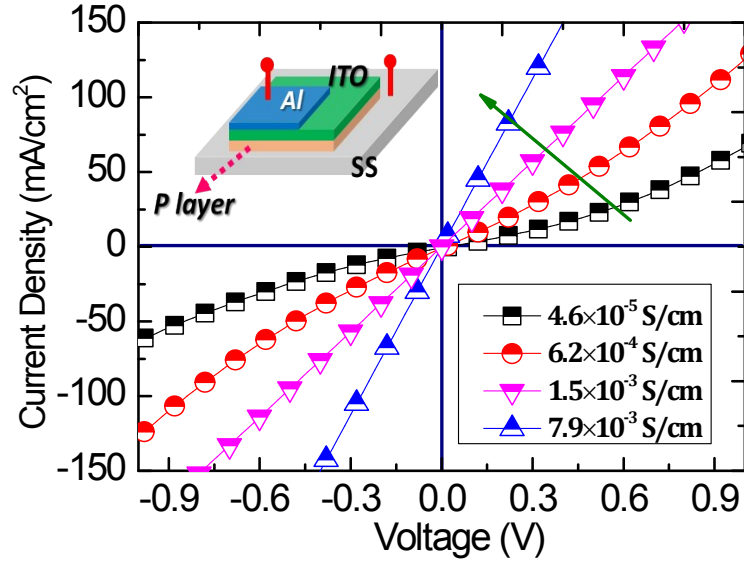

Fig. S2. J-V measurement results of the samples with SS / p layer / ITO / Al architecture. The conductivity of p layer was increased from  $4.6 \times 10^{-5} \text{ S/cm}$  to  $7.9 \times 10^{-3} \text{ S/cm}$ .
